# Supplementary material for: Structural Characterization of New Microcystins Containing Tryptophan and Oxidized Tryptophan Residues
Source: Mar Drugs. 2013 Aug 21;11(8):3025–45. doi: 10.3390/md11083025 (PMC3766880; doi:10.3390/md11083025)

## Supplementary Materials

**Figure S1.** Electrospray ionization collision-induced dissociation MS/MS spectra for (a) MC-WR (1), (b) MC-WA (2), (c) MC-WAb (3) and (d) MC-WL (4).

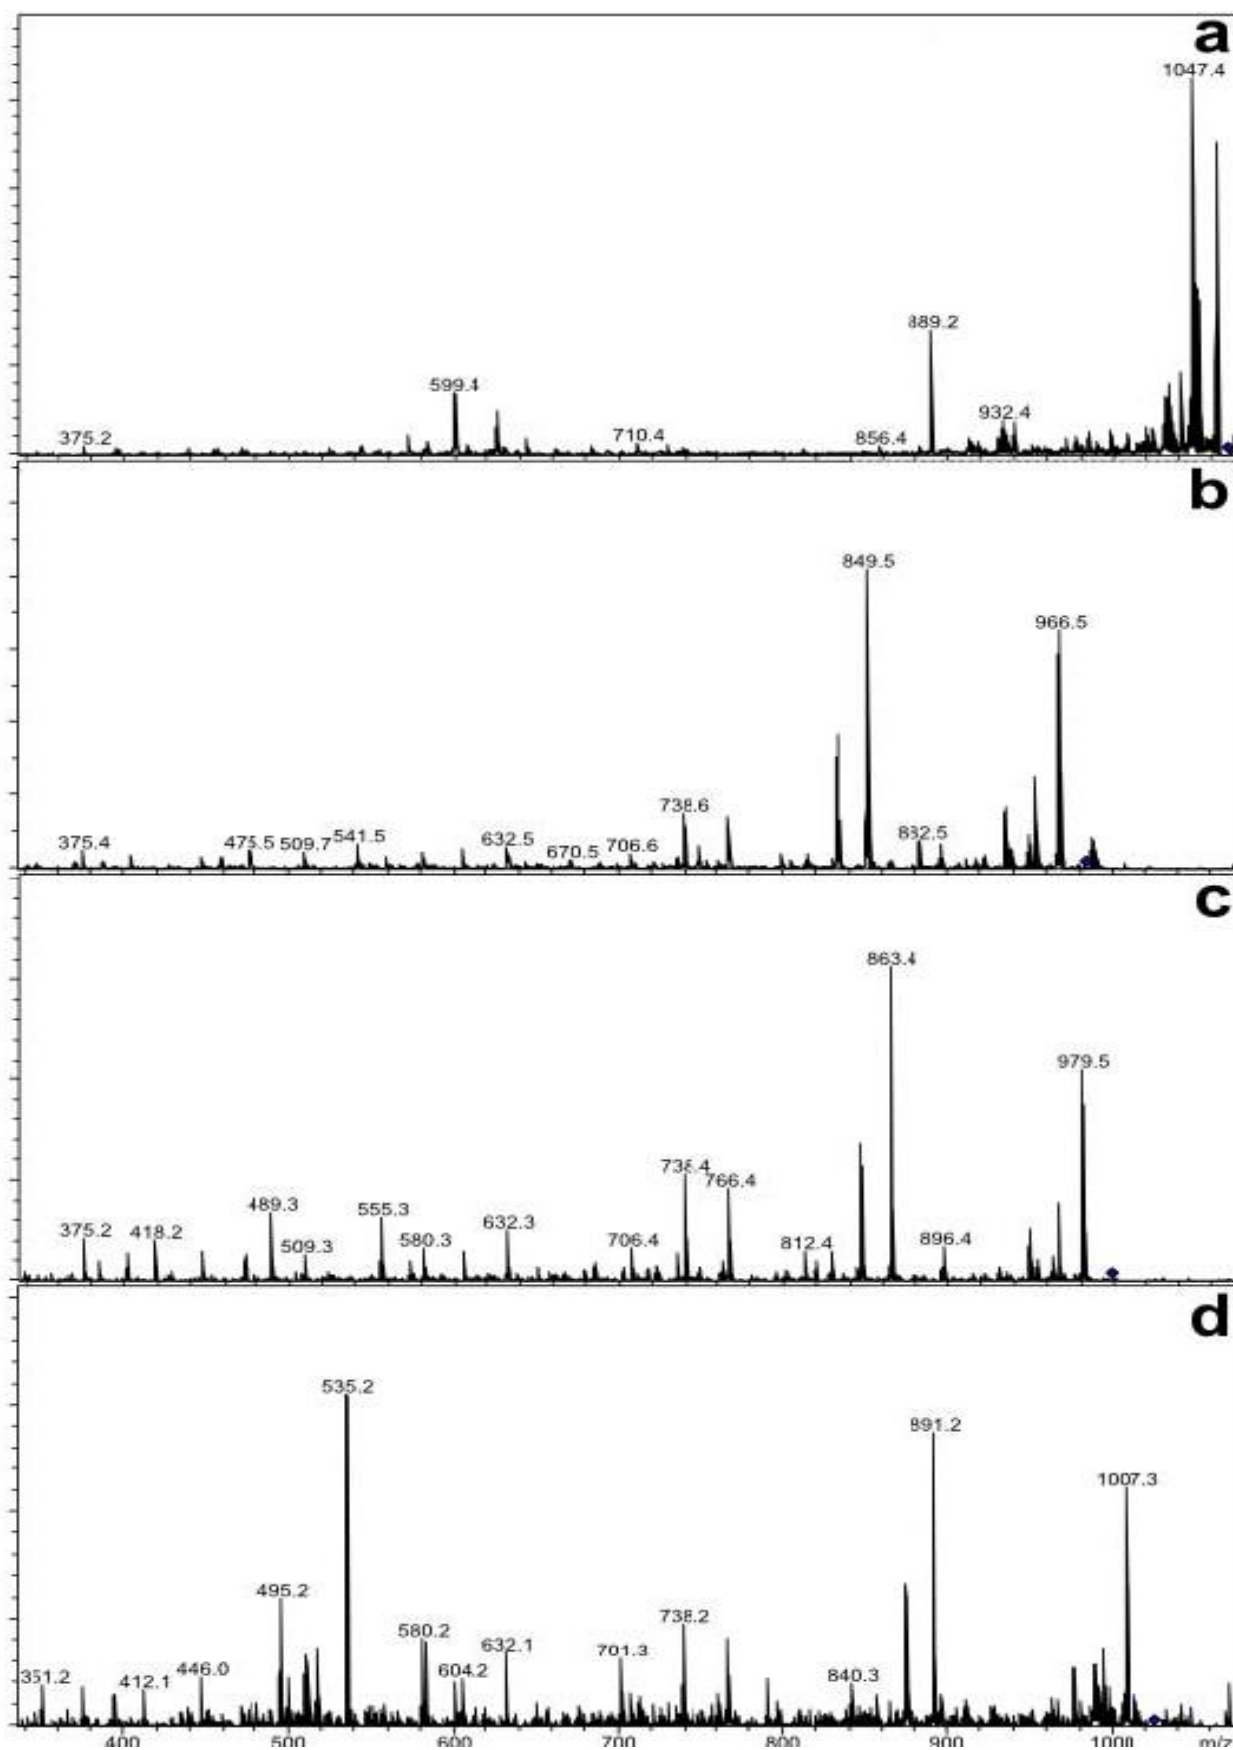

**Figure S2.** Electrospray ionization collision-induced dissociation MS/MS spectra for (a) MC-KynR (5), (b) MC-OiaR (6) and (c) MC-NfkR (7).

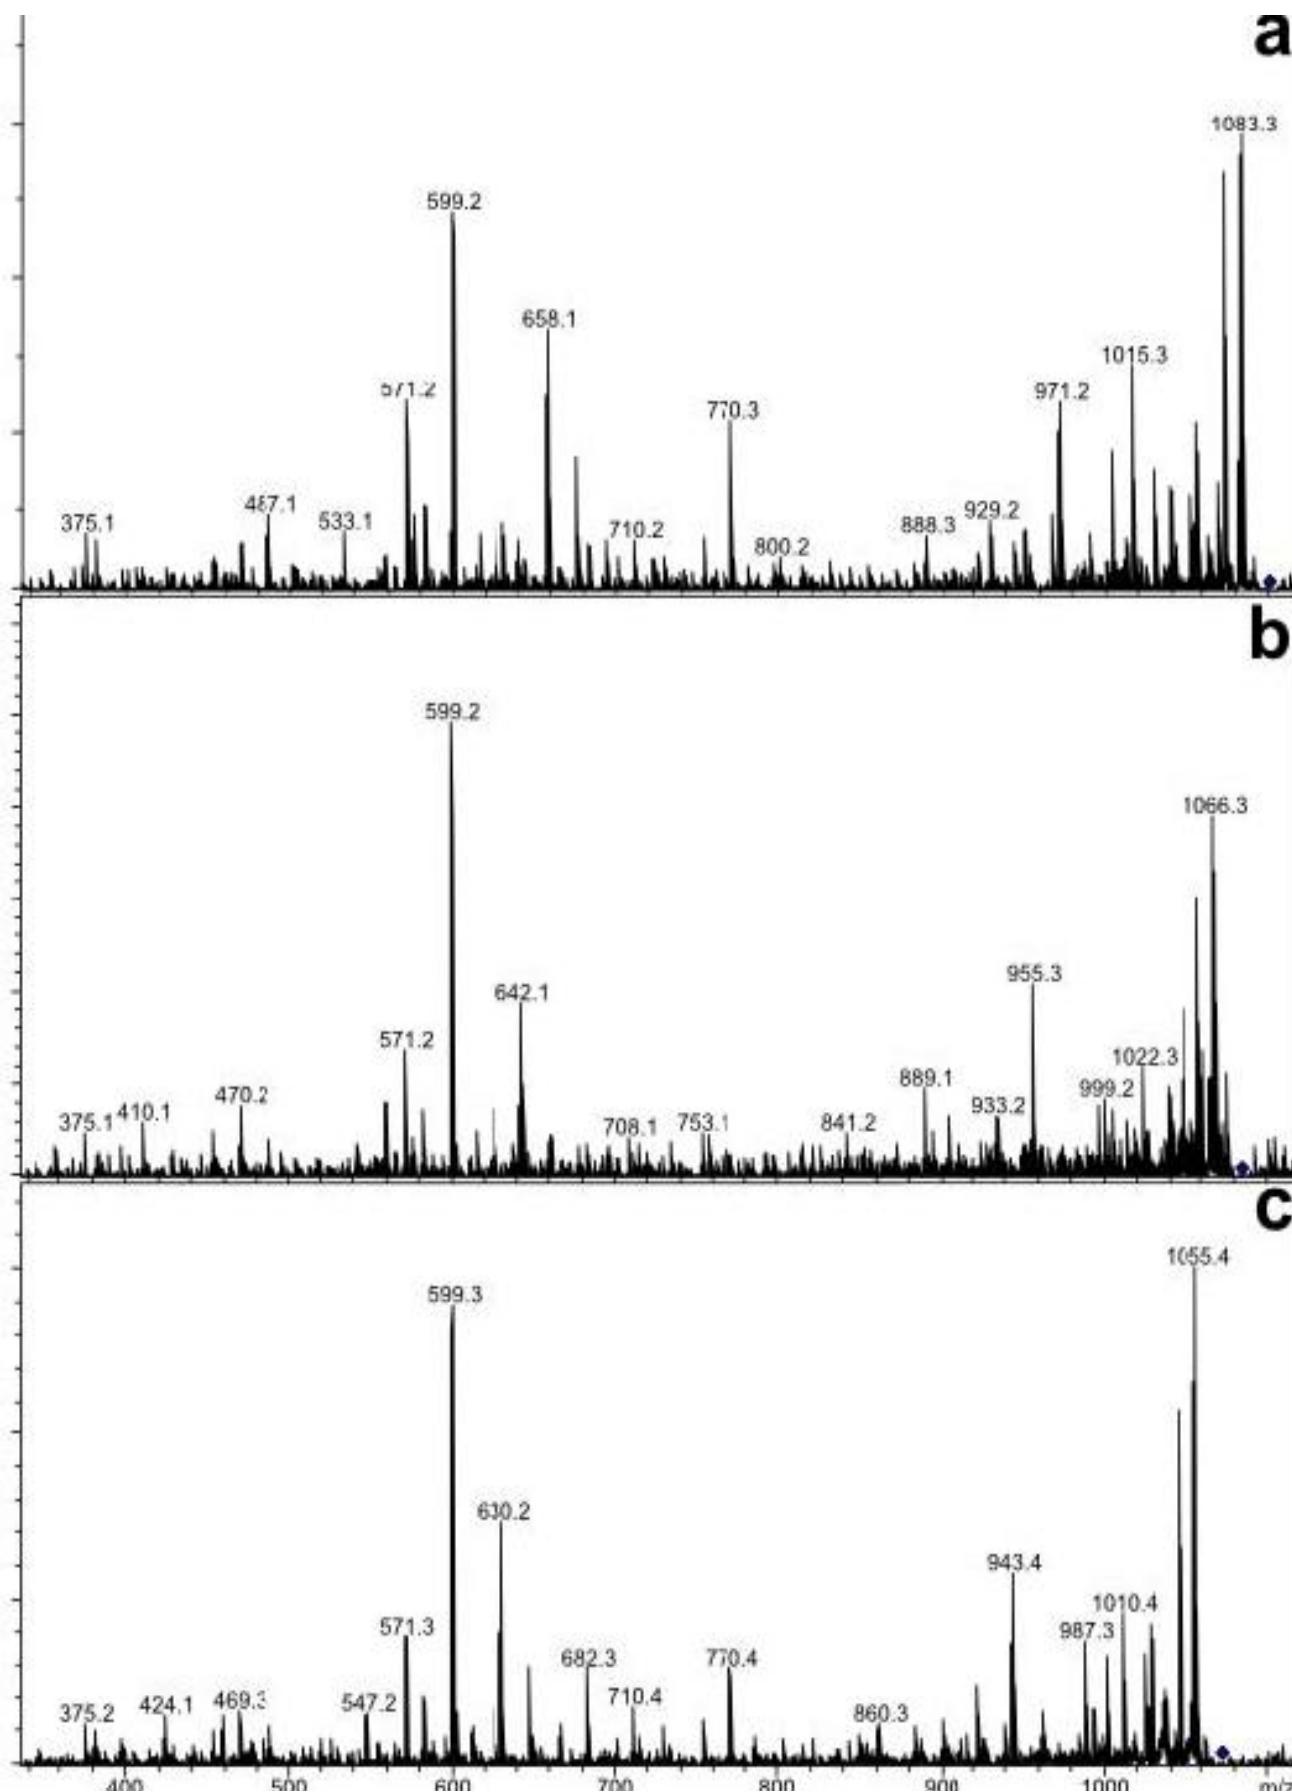

**Figure S3.** Electrospray ionization collision-induced dissociation MS/MS spectra for (a) MC-KynA (**8**), (b) MC-OiaA (**9**) and (c) MC-NfkA (**10**).

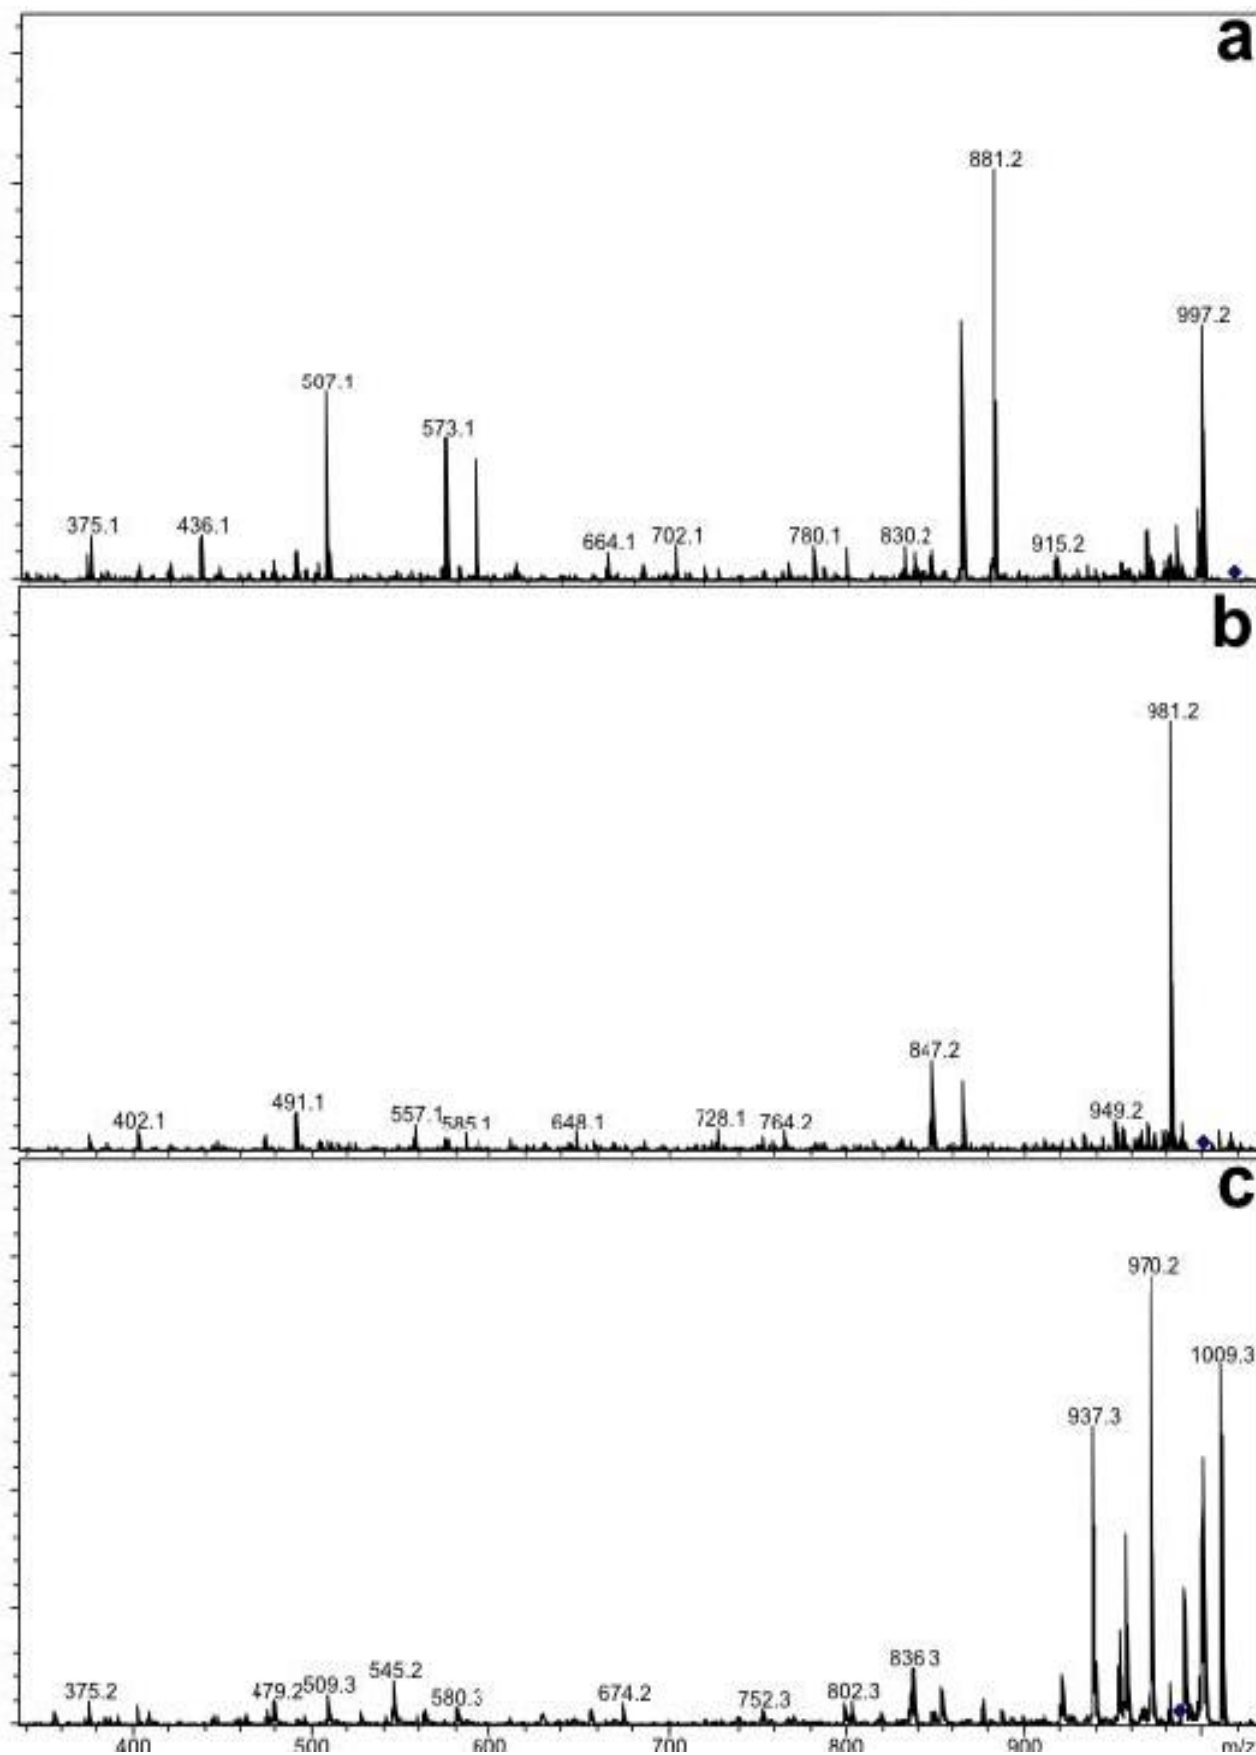

**Figure S4.** Electrospray ionization collision-induced dissociation MS/MS spectra for (a) MC-OiaAba (**12**) and (b) MC-NfkAba (**13**).

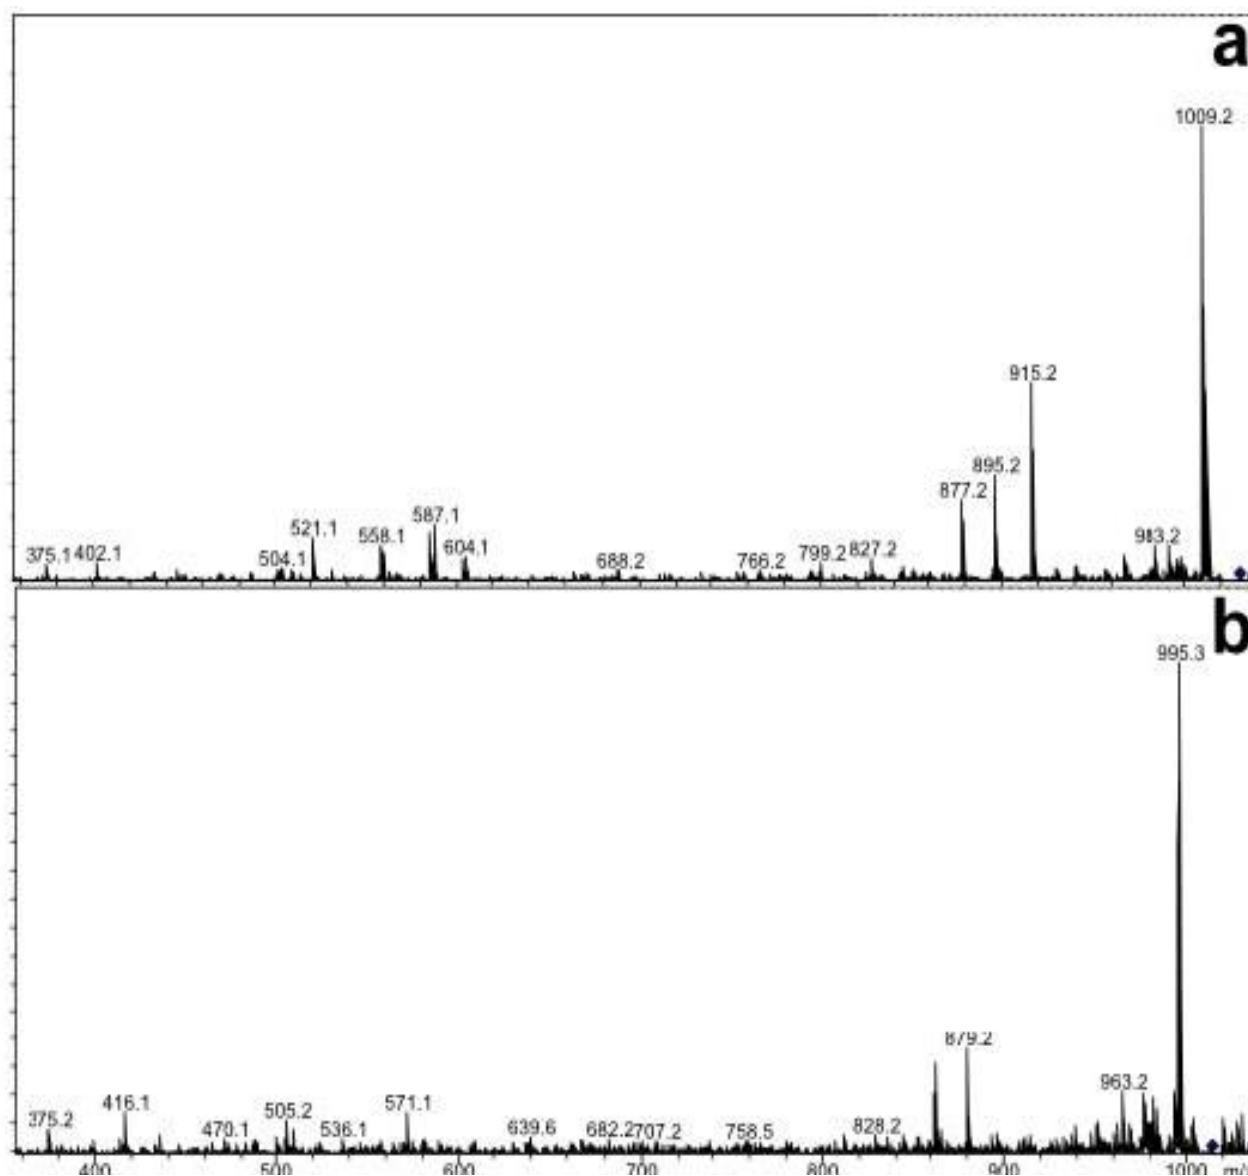

**Table S1.** High-resolution electrospray ionization mass spectrometry analysis of semi-pure mixtures of **1–3** and **5–10**.

| Microcystin           | Measured<br><i>m/z</i> | Molecular<br>Formula | Calculated<br><i>m/z</i> | Deviation<br>(ppm) |
|-----------------------|------------------------|----------------------|--------------------------|--------------------|
| MC-WR ( <b>1</b> )    | 1068.5465              | C54H74N11O12         | 1068.5513                | −4.5               |
| MC-WA ( <b>2</b> )    | 1005.4650              | C51H66N8O12Na        | 1005.4692                | −4.3               |
| MC-WAba ( <b>3</b> )  | 1019.4836              | C52H68N8O12Na        | 1019.4849                | −1.3               |
| MC-KynR ( <b>5</b> )  | 1072.5431              | C53H74N11O13         | 1072.5462                | −2.9               |
| MC-OiaR ( <b>6</b> )  | 1084.5449              | C54H74N11O13         | 1084.5462                | −1.2               |
| MC-NfkR ( <b>7</b> )  | 1100.5449              | C54H74N11O14         | 1100.5411                | +3.4               |
| MC-KynA ( <b>8</b> )  | 1009.4670              | C50H66N8O13Na        | 1009.4642                | +2.8               |
| MC-OiaA ( <b>9</b> )  | 1021.4634              | C51H66N8O13Na        | 1021.4642                | −0.8               |
| MC-NfkA ( <b>10</b> ) | 1037.4598              | C51H66N8O14Na        | 1037.4591                | +0.8               |

**Figure S5.** Downfield region of the <sup>1</sup>H NMR spectrum of MC-NfkA (**10**; 600 MHz; CD3OH; electronic sculpturing suppression of the OH/H<sub>2</sub>O solvent peak and continuous wave suppression of the CHD<sub>2</sub>OH solvent peak).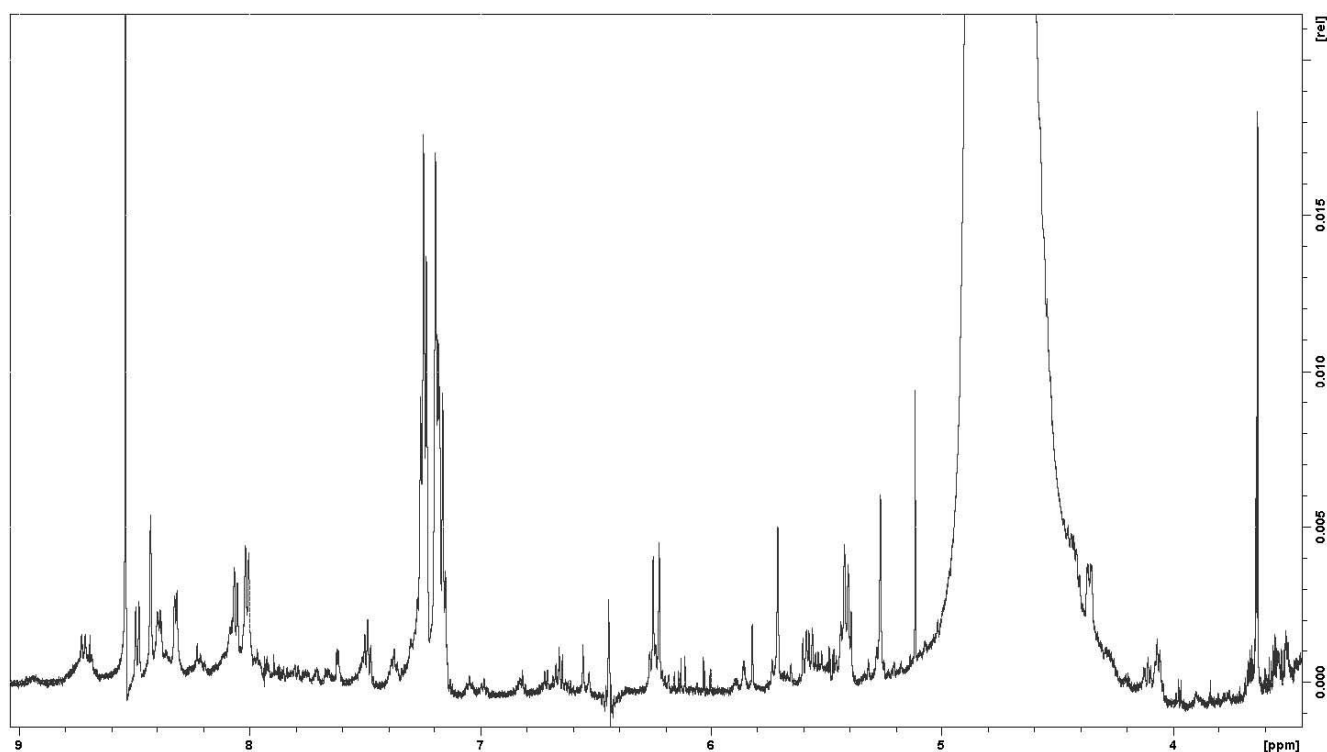

**Figure S6.** Upfield region of the  $^1\text{H}$  NMR spectrum of MC-NfkA (**10**; 600 MHz;  $\text{CD}_3\text{OH}$ ; electronic sculpturing suppression of the  $\text{OH}/\text{H}_2\text{O}$  solvent peak and continuous wave suppression of the  $\text{CHD}_2\text{OH}$  solvent peak).

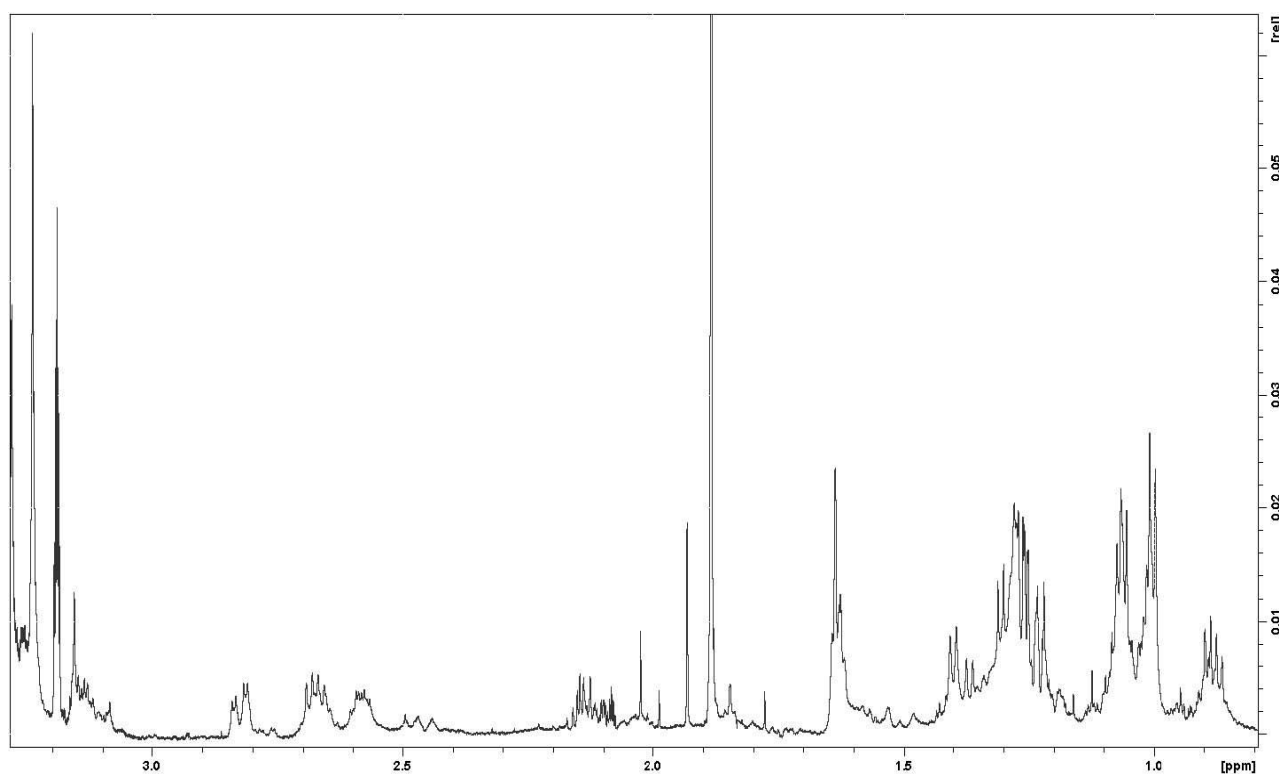

**Figure S7.** Downfield region of the  $^1\text{H}$ - $^{13}\text{C}$  HSQC NMR spectrum of MC-NfkA (**10**;  $\text{CD}_3\text{OH}$ ; continuous wave suppression of the  $\text{OH}/\text{H}_2\text{O}$  solvent peak).

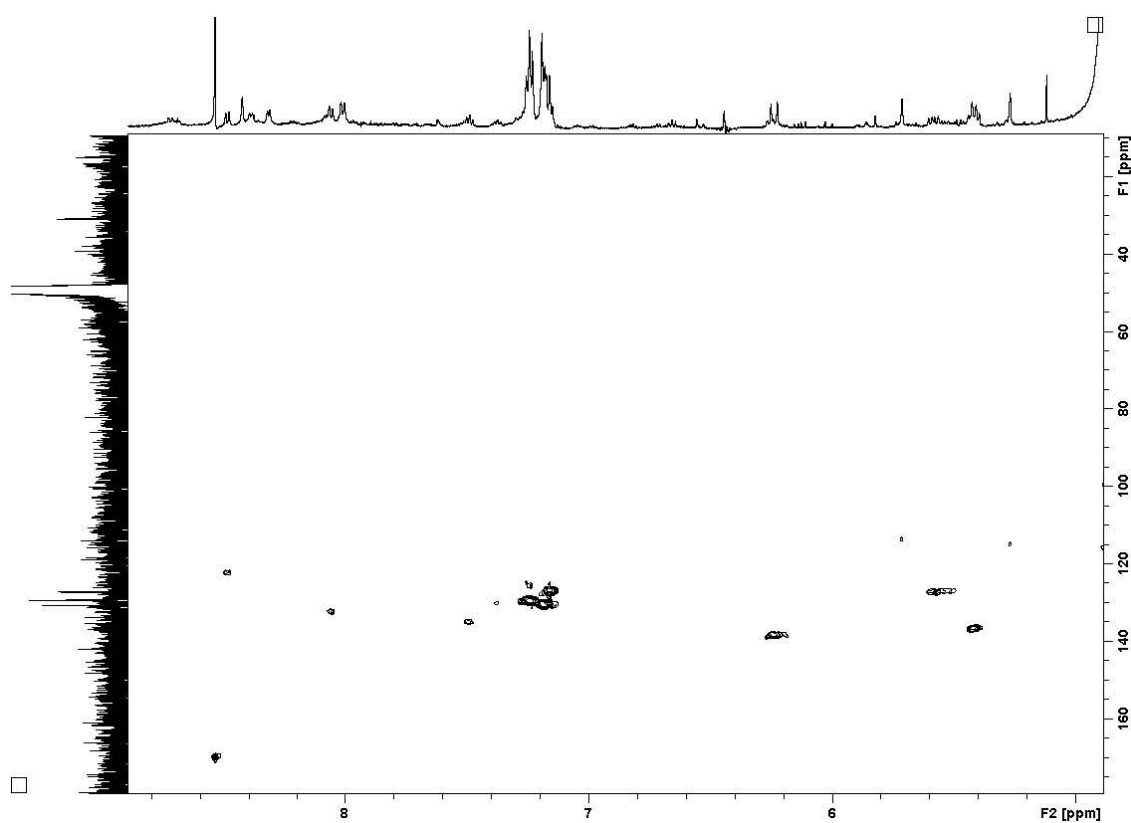

**Figure S8.** Upfield region of the  $^1\text{H}$ - $^{13}\text{C}$  HSQC NMR spectrum of MC-NfkA (**10**;  $\text{CD}_3\text{OH}$ ; continuous wave suppression of the  $\text{OH}/\text{H}_2\text{O}$  solvent peak).

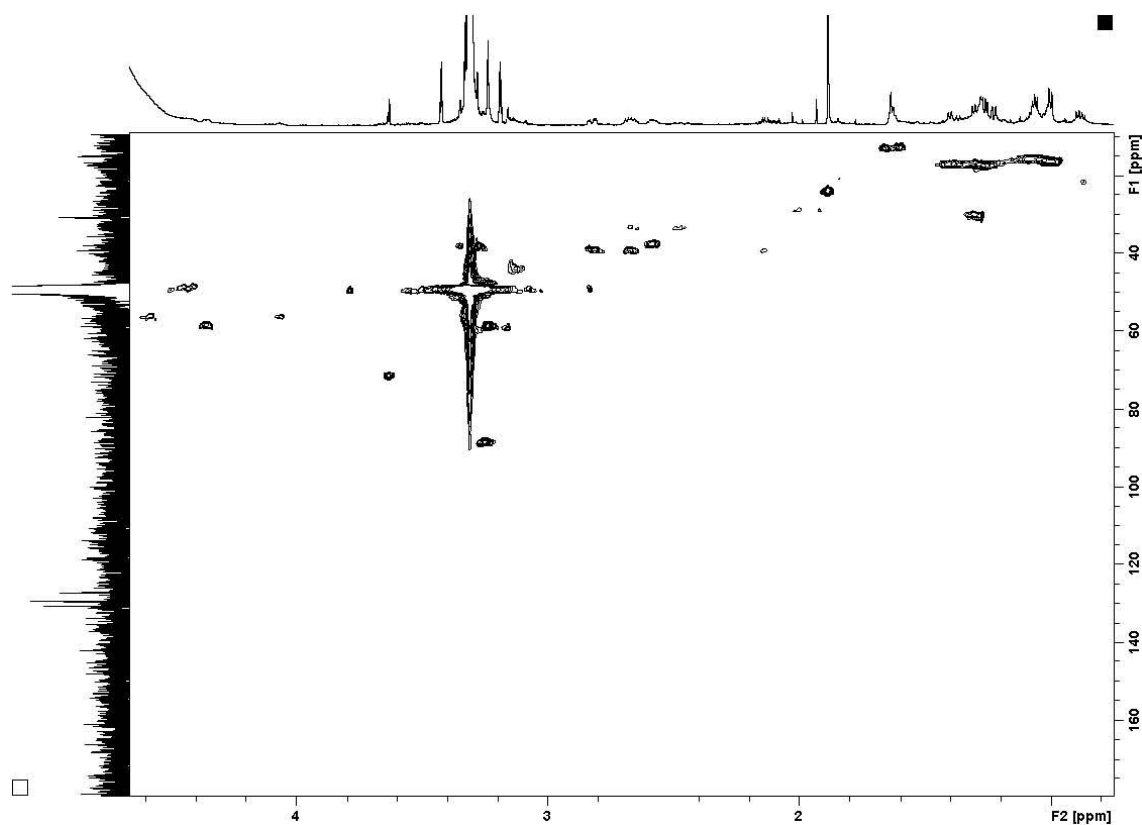

**Figure S9.**  $^1\text{H}$ - $^{13}\text{C}$  HMBC NMR spectrum of MC-NfkA (**10**;  $\text{CD}_3\text{OH}$ ).

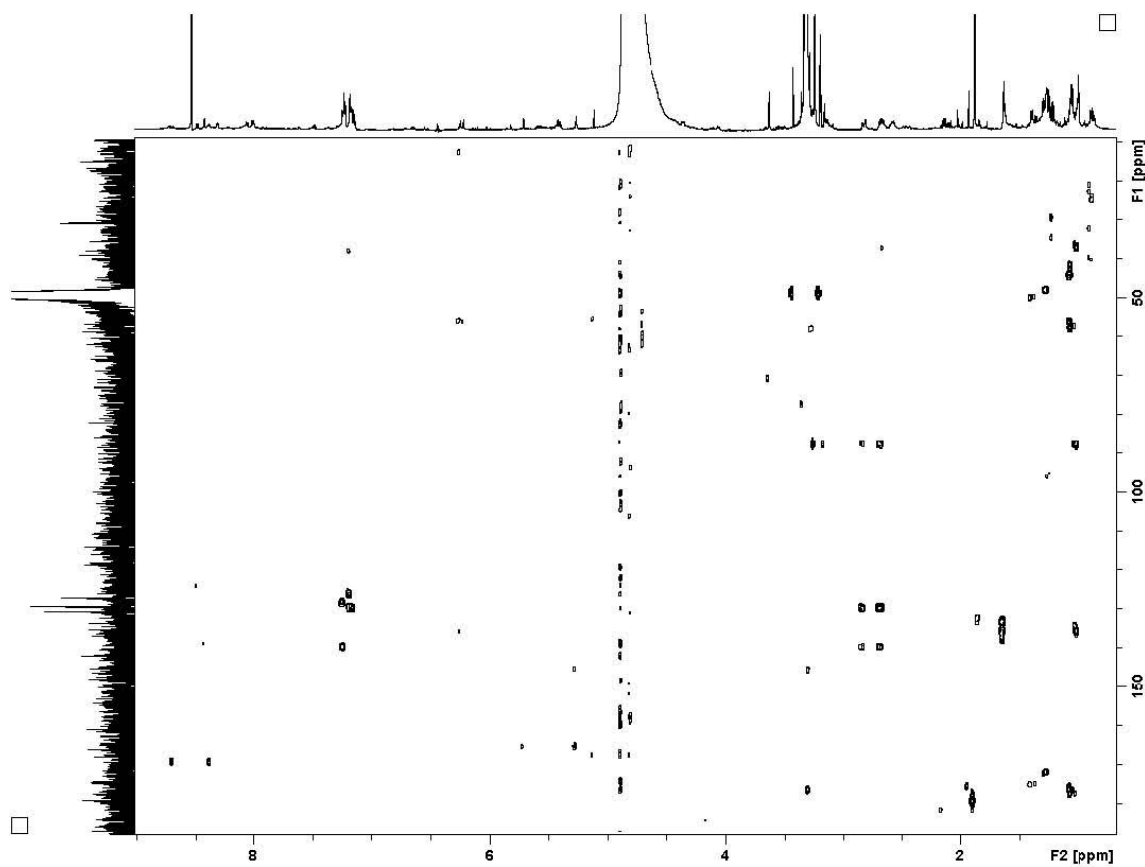

**Figure S10.**  $^1\text{H}$ - $^1\text{H}$  COSY NMR spectrum of MC-NfkA (**10**;  $\text{CD}_3\text{OH}$ ; continuous wave suppression of the  $\text{OH}/\text{H}_2\text{O}$  solvent peak).

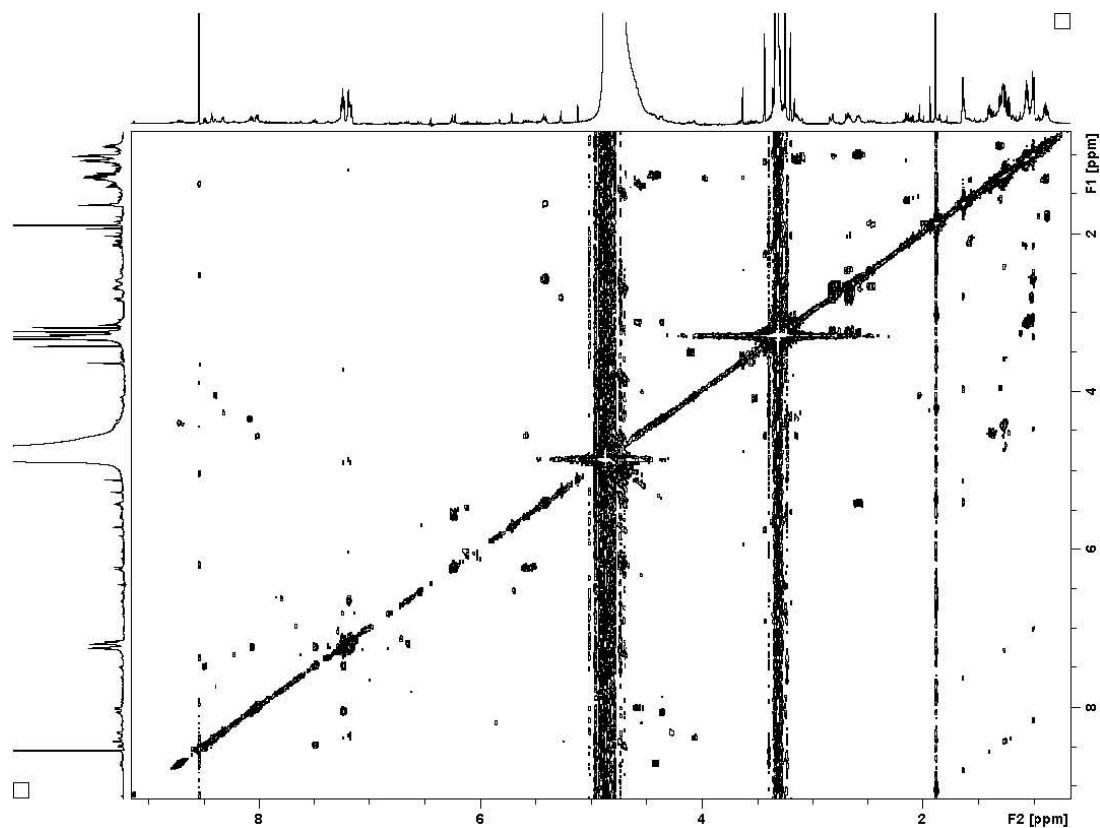

**Figure S11.**  $^1\text{H}$ - $^1\text{H}$  ROESY NMR spectrum of MC-NfkA (**10**;  $\text{CD}_3\text{OH}$ ; continuous wave suppression of the  $\text{OH}/\text{H}_2\text{O}$  solvent peak).

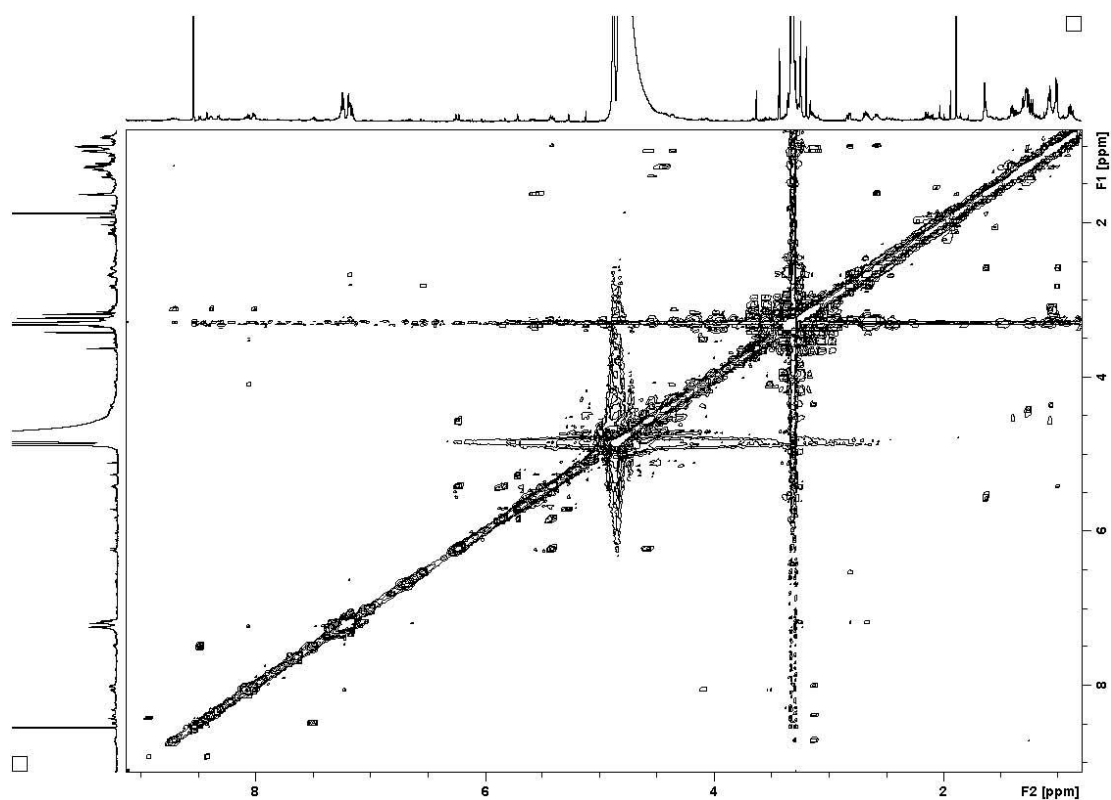

**Figure S12.** Graphs depicting the oxidation of MC-WA into MC-KynA, MC-OiaA and MC-NfkA through (a) diffusion with atmospheric oxygen, (b) the application of stirring and (c) the application of hydrogen peroxide.

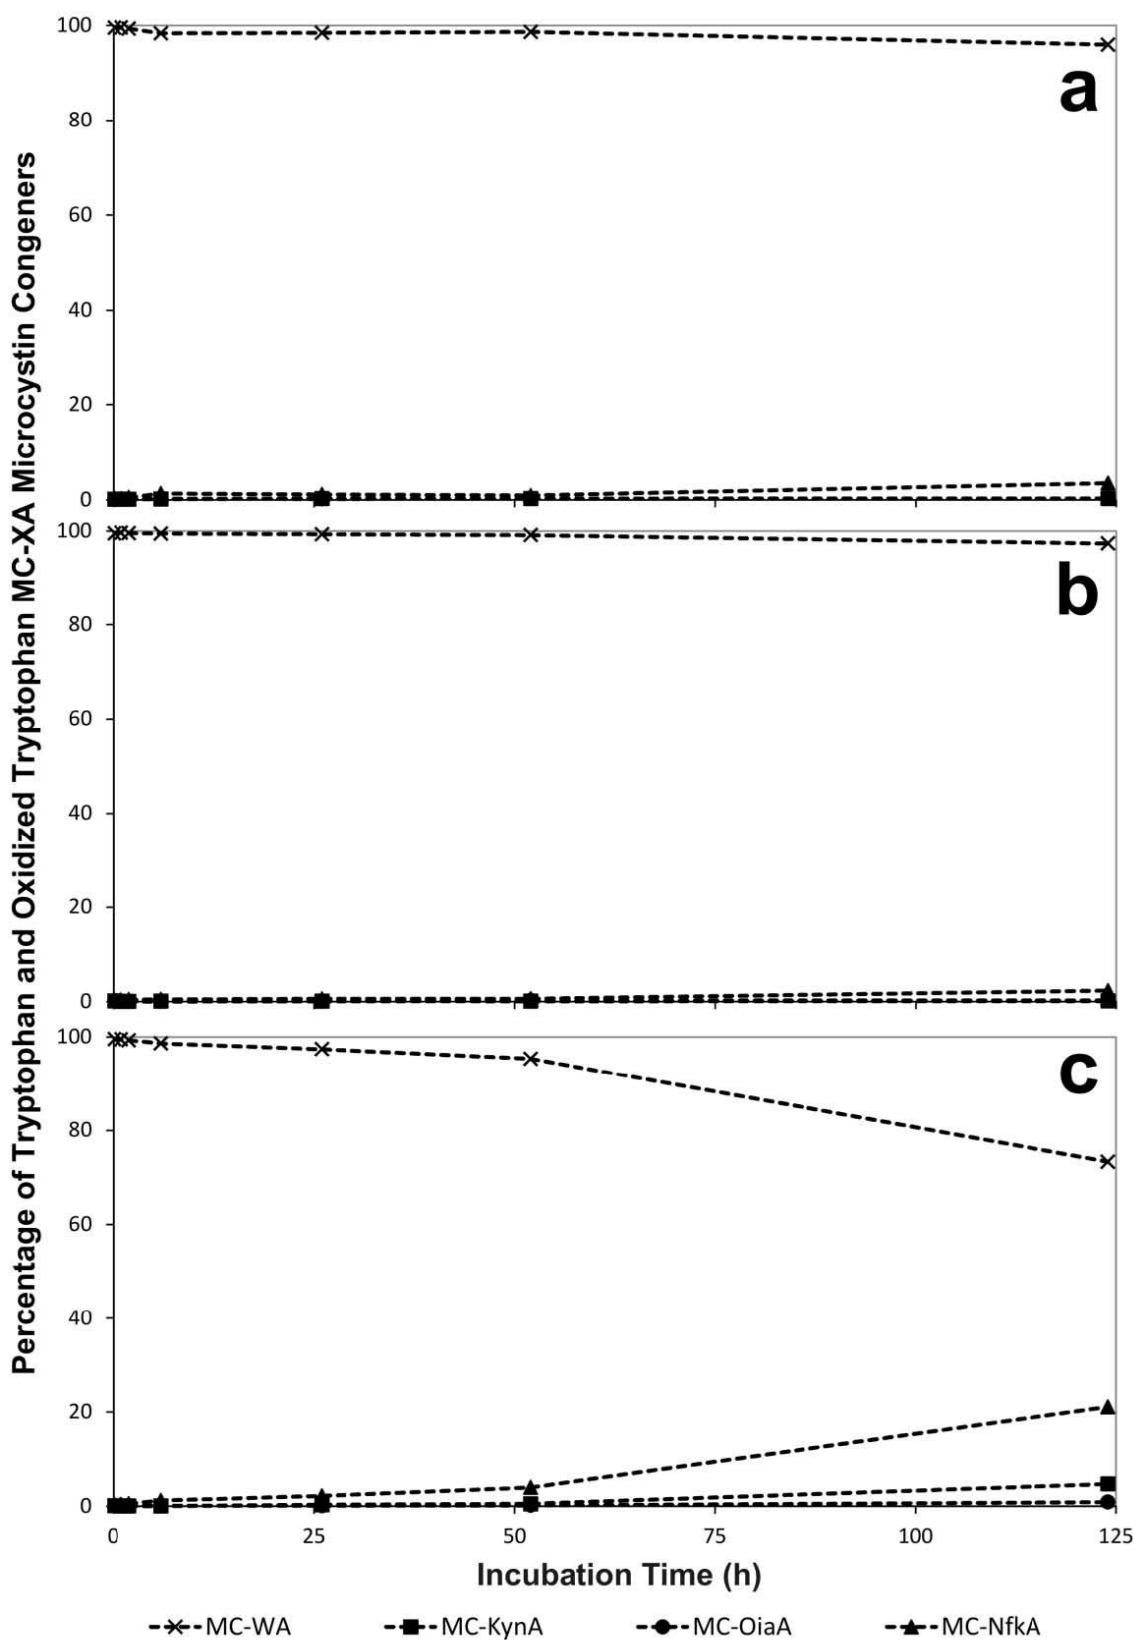

Supplement: Supplementary File 1 — Supplementary Materials (PDF, 746 KB) [file marinedrugs-11-03025-s001.pdf]
