# Supplementary material for: Structural Characterization of New Microcystins Containing Tryptophan and Oxidized Tryptophan Residues
Source: MDPI journal article supplement (doi:10.3390/md11083025), 2013-08-21
Supplement: s3 [file s3]

marinedrugs-11-03025-s001.mol
  ChemDraw04141416302D

 77 80  0  0  0  0  0  0  0  0999 V2000
   -8.5458    1.4717    0.0000 C   0  0  0  0  0  0  0  0  0  0  0  0
   -8.5458    0.6467    0.0000 C   0  0  0  0  0  0  0  0  0  0  0  0
   -7.8314    0.2342    0.0000 C   0  0  0  0  0  0  0  0  0  0  0  0
   -7.1169    0.6467    0.0000 C   0  0  0  0  0  0  0  0  0  0  0  0
   -7.1169    1.4717    0.0000 C   0  0  0  0  0  0  0  0  0  0  0  0
   -7.8314    1.8841    0.0000 C   0  0  0  0  0  0  0  0  0  0  0  0
   -6.4024    0.2342    0.0000 C   0  0  0  0  0  0  0  0  0  0  0  0
   -5.6879    0.6467    0.0000 C   0  0  0  0  0  0  0  0  0  0  0  0
   -4.9735    0.2342    0.0000 C   0  0  0  0  0  0  0  0  0  0  0  0
   -4.2590    0.6467    0.0000 C   0  0  0  0  0  0  0  0  0  0  0  0
   -3.5445    0.2342    0.0000 C   0  0  0  0  0  0  0  0  0  0  0  0
   -2.8301    0.6467    0.0000 C   0  0  0  0  0  0  0  0  0  0  0  0
   -2.1156    0.2342    0.0000 C   0  0  0  0  0  0  0  0  0  0  0  0
   -1.4011    0.6467    0.0000 C   0  0  0  0  0  0  0  0  0  0  0  0
   -0.6866    0.2342    0.0000 N   0  0  0  0  0  0  0  0  0  0  0  0
    0.0278    1.4717    0.0000 O   0  0  0  0  0  0  0  0  0  0  0  0
   -0.6866    1.8841    0.0000 C   0  0  0  0  0  0  0  0  0  0  0  0
   -1.4011    1.4717    0.0000 C   0  0  0  0  0  0  0  0  0  0  0  0
   -0.6866   -0.5908    0.0000 C   0  0  0  0  0  0  0  0  0  0  0  0
    0.0072   -1.0445    0.0000 C   0  0  0  0  0  0  0  0  0  0  0  0
    0.7423   -0.5908    0.0000 N   0  0  0  0  0  0  0  0  0  0  0  0
    1.4568   -1.8283    0.0000 O   0  0  0  0  0  0  0  0  0  0  0  0
    1.4568   -1.0033    0.0000 C   0  0  0  0  0  0  0  0  0  0  0  0
    2.3023   -2.4117    0.0000 O   0  0  0  0  0  0  0  0  0  0  0  0
    2.8857   -1.8283    0.0000 C   0  0  0  0  0  0  0  0  0  0  0  0
    2.8857   -1.0033    0.0000 C   0  0  0  0  0  0  0  0  0  0  0  0
    2.1712   -0.5908    0.0000 C   0  0  0  0  0  0  0  0  0  0  0  0
    4.3147   -1.8283    0.0000 O   0  0  0  0  0  0  0  0  0  0  0  0
    4.3147   -1.0033    0.0000 C   0  0  0  0  0  0  0  0  0  0  0  0
    3.6002   -0.5908    0.0000 N   0  0  0  0  0  0  0  0  0  0  0  0
    5.7436   -1.0033    0.0000 C   0  0  0  0  0  0  0  0  0  0  0  0
    5.0291   -0.5908    0.0000 C   0  0  0  0  0  0  0  0  0  0  0  0
    0.7423    2.7091    0.0000 C   0  0  0  0  0  0  0  0  0  0  0  0
    0.0278    3.1216    0.0000 C   0  0  0  0  0  0  0  0  0  0  0  0
   -0.6866    2.7091    0.0000 N   0  0  0  0  0  0  0  0  0  0  0  0
    2.1712    1.8841    0.0000 O   0  0  0  0  0  0  0  0  0  0  0  0
    2.1712    2.7091    0.0000 C   0  0  0  0  0  0  0  0  0  0  0  0
    1.4568    3.1216    0.0000 C   0  0  0  0  0  0  0  0  0  0  0  0
    3.6002    1.8841    0.0000 C   0  0  0  0  0  0  0  0  0  0  0  0
    3.6002    2.7091    0.0000 C   0  0  0  0  0  0  0  0  0  0  0  0
    2.8857    3.1216    0.0000 N   0  0  0  0  0  0  0  0  0  0  0  0
    5.0291    1.8841    0.0000 C   0  0  0  0  0  0  0  0  0  0  0  0
    5.0291    2.7091    0.0000 N   0  0  0  0  0  0  0  0  0  0  0  0
    4.3147    3.1216    0.0000 C   0  0  0  0  0  0  0  0  0  0  0  0
    4.3147    1.4717    0.0000 C   0  0  0  0  0  0  0  0  0  0  0  0
    5.4860    1.1495    0.0000 C   0  0  0  0  0  0  0  0  0  0  0  0
    5.0291    0.4553    0.0000 N   0  0  0  0  0  0  0  0  0  0  0  0
    6.1561   -1.7178    0.0000 C   0  0  0  0  0  0  0  0  0  0  0  0
    5.8205   -2.4714    0.0000 C   0  0  0  0  0  0  0  0  0  0  0  0
    6.4336   -3.0235    0.0000 N   0  0  0  0  0  0  0  0  0  0  0  0
    7.1481   -2.6110    0.0000 C   0  0  0  0  0  0  0  0  0  0  0  0
    6.9766   -1.8040    0.0000 C   0  0  0  0  0  0  0  0  0  0  0  0
    7.9327   -2.8659    0.0000 C   0  0  0  0  0  0  0  0  0  0  0  0
    8.5458   -2.3139    0.0000 C   0  0  0  0  0  0  0  0  0  0  0  0
    8.3743   -1.5069    0.0000 C   0  0  0  0  0  0  0  0  0  0  0  0
    7.5897   -1.2520    0.0000 C   0  0  0  0  0  0  0  0  0  0  0  0
   -1.4011   -1.0033    0.0000 O   0  0  0  0  0  0  0  0  0  0  0  0
    3.6002   -2.2408    0.0000 O   0  0  0  0  0  0  0  0  0  0  0  0
    6.3110    1.1495    0.0000 O   0  0  0  0  0  0  0  0  0  0  0  0
    4.3147    3.9466    0.0000 O   0  0  0  0  0  0  0  0  0  0  0  0
    0.0278    3.9466    0.0000 C   0  0  0  0  0  0  0  0  0  0  0  0
    0.7423    4.3591    0.0000 O   0  0  0  0  0  0  0  0  0  0  0  0
   -0.6866    4.3591    0.0000 O   0  0  0  0  0  0  0  0  0  0  0  0
   -2.1156    1.8841    0.0000 C   0  0  0  0  0  0  0  0  0  0  0  0
   -4.9735   -0.5908    0.0000 C   0  0  0  0  0  0  0  0  0  0  0  0
   -5.6879    1.4717    0.0000 O   0  0  0  0  0  0  0  0  0  0  0  0
   -5.1046    2.0550    0.0000 C   0  0  0  0  0  0  0  0  0  0  0  0
   -3.5445   -0.5908    0.0000 C   0  0  0  0  0  0  0  0  0  0  0  0
    2.1712    0.2342    0.0000 C   0  0  0  0  0  0  0  0  0  0  0  0
    2.8857    3.9466    0.0000 C   0  0  0  0  0  0  0  0  0  0  0  0
    0.0072   -1.8695    0.0000 C   0  0  0  0  0  0  0  0  0  0  0  0
   -0.7897   -2.0831    0.0000 C   0  0  0  0  0  0  0  0  0  0  0  0
   -0.7897   -2.9081    0.0000 C   0  0  0  0  0  0  0  0  0  0  0  0
   -1.5866   -3.1216    0.0000 N   0  0  0  0  0  0  0  0  0  0  0  0
   -1.5866   -3.9466    0.0000 C   0  0  0  0  0  0  0  0  0  0  0  0
   -2.3011   -4.3591    0.0000 N   0  0  0  0  0  0  0  0  0  0  0  0
   -0.8721   -4.3591    0.0000 N   0  0  0  0  0  0  0  0  0  0  0  0
  1  2  2  0      
  2  3  1  0      
  3  4  2  0      
  4  5  1  0      
  5  6  2  0      
  6  1  1  0      
  4  7  1  0      
  7  8  1  0      
  8  9  1  0      
  9 10  1  0      
 10 11  2  0      
 11 12  1  0      
 12 13  2  0      
 14 15  1  0      
 16 17  2  0      
 17 18  1  0      
 18 14  1  0      
 15 19  1  0      
 19 20  1  0      
 20 21  1  0      
 22 23  2  0      
 23 21  1  0      
 24 25  1  0      
 26 27  1  0      
 27 23  1  0      
 28 29  2  0      
 29 30  1  0      
 30 26  1  0      
 31 32  1  0      
 32 29  1  0      
 33 34  1  0      
 34 35  1  0      
 35 17  1  0      
 36 37  2  0      
 37 38  1  0      
 38 33  1  0      
 39 40  2  0      
 40 41  1  0      
 41 37  1  0      
 42 43  1  0      
 43 44  1  0      
 44 40  1  0      
 26 25  1  1      
 42 45  1  1      
 42 46  1  0      
 46 47  1  0      
 32 47  1  0      
 31 48  1  0      
 48 49  2  0      
 49 50  1  0      
 50 51  1  0      
 51 52  2  0      
 52 48  1  0      
 51 53  1  0      
 53 54  2  0      
 54 55  1  0      
 55 56  2  0      
 56 52  1  0      
 19 57  2  0      
 25 58  2  0      
 46 59  2  0      
 44 60  2  0      
 34 61  1  1      
 61 62  2  0      
 61 63  1  0      
 18 64  1  6      
  9 65  1  6      
  8 66  1  6      
 66 67  1  0      
 11 68  1  0      
 14 13  1  1      
 27 69  1  1      
 41 70  1  0      
 20 71  1  1      
 71 72  1  0      
 72 73  1  0      
 73 74  1  0      
 74 75  1  0      
 75 76  1  0      
 75 77  2  0      
M  END
