# Supplementary material for: Structural Characterization of New Microcystins Containing Tryptophan and Oxidized Tryptophan Residues
Source: MDPI journal article supplement (doi:10.3390/md11083025), 2013-08-21
Supplement: s4 [file s4]

marinedrugs-11-03025-s002.mol
  corina  04141404523D 1   1.00000     0.00000 
CORINA 3.49 0023  12.04.2013
 71 74  0  0  0  0  0  0  0  0999 V2000
    0.3866    3.2075   -2.1788 C   0  0  0  0  0  0  0  0  0  0  0  0
   -0.0736    1.9654   -1.7836 C   0  0  0  0  0  0  0  0  0  0  0  0
    0.7996    1.0497   -1.2268 C   0  0  0  0  0  0  0  0  0  0  0  0
    2.1332    1.3760   -1.0657 C   0  0  0  0  0  0  0  0  0  0  0  0
    2.5936    2.6178   -1.4619 C   0  0  0  0  0  0  0  0  0  0  0  0
    1.7201    3.5339   -2.0173 C   0  0  0  0  0  0  0  0  0  0  0  0
    3.0849    0.3782   -0.4579 C   0  0  0  0  0  0  0  0  0  0  0  0
    3.6941   -0.4851   -1.5645 C   0  0  0  0  0  0  0  0  0  0  0  0
    4.7517   -1.4131   -0.9634 C   0  0  0  0  0  0  0  0  0  0  0  0
    5.4528   -2.1587   -2.0696 C   0  0  0  0  0  0  0  0  0  0  0  0
    6.7572   -1.9925   -2.2600 C   0  0  0  0  0  0  0  0  0  0  0  0
    7.4694   -2.8257   -3.2412 C   0  0  0  0  0  0  0  0  0  0  0  0
    8.7739   -2.6595   -3.4316 C   0  0  0  0  0  0  0  0  0  0  0  0
    9.5018   -3.5111   -4.4345 C   0  0  0  0  0  0  0  0  0  0  0  0
   10.4903   -4.3796   -3.7818 N   0  0  0  0  0  0  0  0  0  0  0  0
    8.0243   -2.5453   -6.4944 O   0  0  0  0  0  0  0  0  0  0  0  0
    9.2313   -2.5192   -6.6830 C   0  0  0  0  0  0  0  0  0  0  0  0
   10.1628   -2.6398   -5.5045 C   0  0  0  0  0  0  0  0  0  0  0  0
   11.3366   -3.9007   -2.8408 C   0  0  0  0  0  0  0  0  0  0  0  0
   12.1897   -4.8869   -2.0701 C   0  0  0  0  0  0  0  0  0  0  0  0
   13.2453   -4.1237   -1.3658 N   0  0  0  0  0  0  0  0  0  0  0  0
   14.7652   -5.4123   -2.3918 O   0  0  0  0  0  0  0  0  0  0  0  0
   14.5323   -4.4856   -1.6433 C   0  0  0  0  0  0  0  0  0  0  0  0
   17.4848   -5.8249    0.4851 O   0  0  0  0  0  0  0  0  0  0  0  0
   17.7731   -4.6904   -0.1719 C   0  0  0  0  0  0  0  0  0  0  0  0
   17.0031   -4.3227   -1.4163 C   0  0  0  0  0  0  0  0  0  0  0  0
   15.6586   -3.7070   -1.0167 C   0  0  0  0  0  0  0  0  0  0  0  0
   18.5468   -5.0061   -3.4620 O   0  0  0  0  0  0  0  0  0  0  0  0
   18.5527   -3.8232   -3.1919 C   0  0  0  0  0  0  0  0  0  0  0  0
   17.7709   -3.3241   -2.1927 N   0  0  0  0  0  0  0  0  0  0  0  0
   20.8949   -3.3304   -3.8235 C   0  0  0  0  0  0  0  0  0  0  0  0
   19.4408   -2.8757   -3.9658 C   0  0  0  0  0  0  0  0  0  0  0  0
   11.5388   -1.6818   -9.4021 C   0  0  0  0  0  0  0  0  0  0  0  0
   11.1183   -2.5797   -8.2315 C   0  0  0  0  0  0  0  0  0  0  0  0
    9.6896   -2.3522   -7.9510 N   0  0  0  0  0  0  0  0  0  0  0  0
   13.2783   -0.8960  -11.4287 O   0  0  0  0  0  0  0  0  0  0  0  0
   13.7808   -1.1500  -10.3555 C   0  0  0  0  0  0  0  0  0  0  0  0
   12.9300   -1.1138   -9.1130 C   0  0  0  0  0  0  0  0  0  0  0  0
   15.4424   -0.0126   -8.4617 C   0  0  0  0  0  0  0  0  0  0  0  0
   15.9039   -0.9669   -9.2748 C   0  0  0  0  0  0  0  0  0  0  0  0
   15.0847   -1.5245  -10.2753 N   0  0  0  0  0  0  0  0  0  0  0  0
   19.1717   -2.0534   -7.6927 C   0  0  0  0  0  0  0  0  0  0  0  0
   17.7494   -1.6699   -7.8227 N   0  0  0  0  0  0  0  0  0  0  0  0
   17.2837   -1.4565   -9.0839 C   0  0  0  0  0  0  0  0  0  0  0  0
   19.3868   -3.4775   -8.2089 C   0  0  0  0  0  0  0  0  0  0  0  0
   19.5492   -1.9915   -6.2296 C   0  0  0  0  0  0  0  0  0  0  0  0
   19.0347   -2.9198   -5.3837 N   0  0  0  0  0  0  0  0  0  0  0  0
   21.8024   -2.3268   -4.4871 C   0  0  0  0  0  0  0  0  0  0  0  0
   22.2790   -2.3875   -5.7405 C   0  0  0  0  0  0  0  0  0  0  0  0
   23.0702   -1.2998   -5.9919 N   0  0  0  0  0  0  0  0  0  0  0  0
   23.1233   -0.4922   -4.8780 C   0  0  0  0  0  0  0  0  0  0  0  0
   22.3265   -1.0967   -3.8888 C   0  0  0  0  0  0  0  0  0  0  0  0
   23.7662    0.7088   -4.5954 C   0  0  0  0  0  0  0  0  0  0  0  0
   23.6211    1.2868   -3.3536 C   0  0  0  0  0  0  0  0  0  0  0  0
   22.8386    0.6830   -2.3786 C   0  0  0  0  0  0  0  0  0  0  0  0
   22.1924   -0.4927   -2.6370 C   0  0  0  0  0  0  0  0  0  0  0  0
   11.4635   -2.7219   -2.5894 O   0  0  0  0  0  0  0  0  0  0  0  0
   18.6493   -3.9638    0.2333 O   0  0  0  0  0  0  0  0  0  0  0  0
   20.2959   -1.1200   -5.8397 O   0  0  0  0  0  0  0  0  0  0  0  0
   18.0202   -1.6171  -10.0429 O   0  0  0  0  0  0  0  0  0  0  0  0
   11.3361   -4.0223   -8.6172 C   0  0  0  0  0  0  0  0  0  0  0  0
   10.4037   -4.6963   -8.9867 O   0  0  0  0  0  0  0  0  0  0  0  0
   12.5655   -4.5568   -8.5499 O   0  0  0  0  0  0  0  0  0  0  0  0
   10.4136   -1.2362   -4.9410 C   0  0  0  0  0  0  0  0  0  0  0  0
    4.0772   -2.4130   -0.0221 C   0  0  0  0  0  0  0  0  0  0  0  0
    2.6675   -1.2672   -2.1781 O   0  0  0  0  0  0  0  0  0  0  0  0
    2.5983   -1.1241   -3.5982 C   0  0  0  0  0  0  0  0  0  0  0  0
    7.5071   -0.9504   -1.4708 C   0  0  0  0  0  0  0  0  0  0  0  0
   15.5227   -3.7400    0.5076 C   0  0  0  0  0  0  0  0  0  0  0  0
   15.6022   -2.5226  -11.2257 C   0  0  0  0  0  0  0  0  0  0  0  0
   11.3164   -5.6211   -1.0512 C   0  0  0  0  0  0  0  0  0  0  0  0
  1  2  2  0      
  2  3  1  0      
  3  4  2  0      
  4  5  1  0      
  5  6  2  0      
  6  1  1  0      
  4  7  1  0      
  7  8  1  0      
  8  9  1  0      
  9 10  1  0      
 10 11  2  0      
 11 12  1  0      
 12 13  2  0      
 14 15  1  0      
 16 17  2  0      
 17 18  1  0      
 18 14  1  0      
 15 19  1  0      
 19 20  1  0      
 20 21  1  0      
 22 23  2  0      
 23 21  1  0      
 24 25  1  0      
 26 27  1  0      
 27 23  1  0      
 28 29  2  0      
 29 30  1  0      
 30 26  1  0      
 31 32  1  0      
 32 29  1  0      
 33 34  1  0      
 34 35  1  0      
 35 17  1  0      
 36 37  2  0      
 37 38  1  0      
 38 33  1  0      
 39 40  2  0      
 40 41  1  0      
 41 37  1  0      
 42 43  1  0      
 43 44  1  0      
 44 40  1  0      
 26 25  1  0      
 42 45  1  0      
 42 46  1  0      
 46 47  1  0      
 32 47  1  0      
 31 48  1  0      
 48 49  2  0      
 49 50  1  0      
 50 51  1  0      
 51 52  2  0      
 52 48  1  0      
 51 53  1  0      
 53 54  2  0      
 54 55  1  0      
 55 56  2  0      
 56 52  1  0      
 19 57  2  0      
 25 58  2  0      
 46 59  2  0      
 44 60  2  0      
 34 61  1  0      
 61 62  2  0      
 61 63  1  0      
 18 64  1  0      
  9 65  1  0      
  8 66  1  0      
 66 67  1  0      
 11 68  1  0      
 14 13  1  0      
 27 69  1  0      
 41 70  1  0      
 20 71  1  0      
M  END
$$$$
