# Supplementary material for: Structural Characterization of New Microcystins Containing Tryptophan and Oxidized Tryptophan Residues
Source: MDPI journal article supplement (doi:10.3390/md11083025), 2013-08-21
Supplement: s5 [file s5]

marinedrugs-11-03025-s002.mol
  ChemDraw12271312032D

 71 74  0  0  0  0  0  0  0  0999 V2000
   -8.5458    0.8038    0.0000 C   0  0  0  0  0  0  0  0  0  0  0  0
   -8.5458   -0.0212    0.0000 C   0  0  0  0  0  0  0  0  0  0  0  0
   -7.8314   -0.4337    0.0000 C   0  0  0  0  0  0  0  0  0  0  0  0
   -7.1169   -0.0212    0.0000 C   0  0  0  0  0  0  0  0  0  0  0  0
   -7.1169    0.8038    0.0000 C   0  0  0  0  0  0  0  0  0  0  0  0
   -7.8314    1.2163    0.0000 C   0  0  0  0  0  0  0  0  0  0  0  0
   -6.4024   -0.4337    0.0000 C   0  0  0  0  0  0  0  0  0  0  0  0
   -5.6879   -0.0212    0.0000 C   0  0  0  0  0  0  0  0  0  0  0  0
   -4.9735   -0.4337    0.0000 C   0  0  0  0  0  0  0  0  0  0  0  0
   -4.2590   -0.0212    0.0000 C   0  0  0  0  0  0  0  0  0  0  0  0
   -3.5445   -0.4337    0.0000 C   0  0  0  0  0  0  0  0  0  0  0  0
   -2.8301   -0.0212    0.0000 C   0  0  0  0  0  0  0  0  0  0  0  0
   -2.1156   -0.4337    0.0000 C   0  0  0  0  0  0  0  0  0  0  0  0
   -1.4011   -0.0212    0.0000 C   0  0  0  0  0  0  0  0  0  0  0  0
   -0.6866   -0.4337    0.0000 N   0  0  0  0  0  0  0  0  0  0  0  0
    0.0278    0.8038    0.0000 O   0  0  0  0  0  0  0  0  0  0  0  0
   -0.6866    1.2163    0.0000 C   0  0  0  0  0  0  0  0  0  0  0  0
   -1.4011    0.8038    0.0000 C   0  0  0  0  0  0  0  0  0  0  0  0
   -0.6866   -1.2587    0.0000 C   0  0  0  0  0  0  0  0  0  0  0  0
    0.0278   -1.6712    0.0000 C   0  0  0  0  0  0  0  0  0  0  0  0
    0.7423   -1.2587    0.0000 N   0  0  0  0  0  0  0  0  0  0  0  0
    1.4568   -2.4962    0.0000 O   0  0  0  0  0  0  0  0  0  0  0  0
    1.4568   -1.6712    0.0000 C   0  0  0  0  0  0  0  0  0  0  0  0
    2.1712   -2.9087    0.0000 O   0  0  0  0  0  0  0  0  0  0  0  0
    2.8857   -2.4962    0.0000 C   0  0  0  0  0  0  0  0  0  0  0  0
    2.8857   -1.6712    0.0000 C   0  0  0  0  0  0  0  0  0  0  0  0
    2.1712   -1.2587    0.0000 C   0  0  0  0  0  0  0  0  0  0  0  0
    4.3147   -2.4962    0.0000 O   0  0  0  0  0  0  0  0  0  0  0  0
    4.3147   -1.6712    0.0000 C   0  0  0  0  0  0  0  0  0  0  0  0
    3.6002   -1.2587    0.0000 N   0  0  0  0  0  0  0  0  0  0  0  0
    5.7436   -1.6712    0.0000 C   0  0  0  0  0  0  0  0  0  0  0  0
    5.0291   -1.2587    0.0000 C   0  0  0  0  0  0  0  0  0  0  0  0
    0.7423    2.0413    0.0000 C   0  0  0  0  0  0  0  0  0  0  0  0
    0.0278    2.4538    0.0000 C   0  0  0  0  0  0  0  0  0  0  0  0
   -0.6866    2.0413    0.0000 N   0  0  0  0  0  0  0  0  0  0  0  0
    2.1712    1.2163    0.0000 O   0  0  0  0  0  0  0  0  0  0  0  0
    2.1712    2.0413    0.0000 C   0  0  0  0  0  0  0  0  0  0  0  0
    1.4568    2.4538    0.0000 C   0  0  0  0  0  0  0  0  0  0  0  0
    3.6002    1.2163    0.0000 C   0  0  0  0  0  0  0  0  0  0  0  0
    3.6002    2.0413    0.0000 C   0  0  0  0  0  0  0  0  0  0  0  0
    2.8857    2.4538    0.0000 N   0  0  0  0  0  0  0  0  0  0  0  0
    5.0291    1.2163    0.0000 C   0  0  0  0  0  0  0  0  0  0  0  0
    5.0291    2.0413    0.0000 N   0  0  0  0  0  0  0  0  0  0  0  0
    4.3147    2.4538    0.0000 C   0  0  0  0  0  0  0  0  0  0  0  0
    4.3147    0.8038    0.0000 C   0  0  0  0  0  0  0  0  0  0  0  0
    5.4860    0.4817    0.0000 C   0  0  0  0  0  0  0  0  0  0  0  0
    5.0291   -0.2126    0.0000 N   0  0  0  0  0  0  0  0  0  0  0  0
    6.1561   -2.3856    0.0000 C   0  0  0  0  0  0  0  0  0  0  0  0
    5.8205   -3.1393    0.0000 C   0  0  0  0  0  0  0  0  0  0  0  0
    6.4336   -3.6913    0.0000 N   0  0  0  0  0  0  0  0  0  0  0  0
    7.1481   -3.2788    0.0000 C   0  0  0  0  0  0  0  0  0  0  0  0
    6.9766   -2.4719    0.0000 C   0  0  0  0  0  0  0  0  0  0  0  0
    7.9327   -3.5338    0.0000 C   0  0  0  0  0  0  0  0  0  0  0  0
    8.5458   -2.9817    0.0000 C   0  0  0  0  0  0  0  0  0  0  0  0
    8.3743   -2.1748    0.0000 C   0  0  0  0  0  0  0  0  0  0  0  0
    7.5897   -1.9198    0.0000 C   0  0  0  0  0  0  0  0  0  0  0  0
   -1.4011   -1.6712    0.0000 O   0  0  0  0  0  0  0  0  0  0  0  0
    3.6002   -2.9087    0.0000 O   0  0  0  0  0  0  0  0  0  0  0  0
    6.3110    0.4817    0.0000 O   0  0  0  0  0  0  0  0  0  0  0  0
    4.3147    3.2788    0.0000 O   0  0  0  0  0  0  0  0  0  0  0  0
    0.0278    3.2788    0.0000 C   0  0  0  0  0  0  0  0  0  0  0  0
    0.7423    3.6913    0.0000 O   0  0  0  0  0  0  0  0  0  0  0  0
   -0.6866    3.6913    0.0000 O   0  0  0  0  0  0  0  0  0  0  0  0
   -2.1156    1.2163    0.0000 C   0  0  0  0  0  0  0  0  0  0  0  0
   -4.9735   -1.2587    0.0000 C   0  0  0  0  0  0  0  0  0  0  0  0
   -5.6879    0.8038    0.0000 O   0  0  0  0  0  0  0  0  0  0  0  0
   -5.1046    1.3872    0.0000 C   0  0  0  0  0  0  0  0  0  0  0  0
   -3.5445   -1.2587    0.0000 C   0  0  0  0  0  0  0  0  0  0  0  0
    2.1712   -0.4337    0.0000 C   0  0  0  0  0  0  0  0  0  0  0  0
    2.8857    3.2788    0.0000 C   0  0  0  0  0  0  0  0  0  0  0  0
    0.0278   -2.4962    0.0000 C   0  0  0  0  0  0  0  0  0  0  0  0
  1  2  2  0      
  2  3  1  0      
  3  4  2  0      
  4  5  1  0      
  5  6  2  0      
  6  1  1  0      
  4  7  1  0      
  7  8  1  0      
  8  9  1  0      
  9 10  1  0      
 10 11  2  0      
 11 12  1  0      
 12 13  2  0      
 14 15  1  0      
 16 17  2  0      
 17 18  1  0      
 18 14  1  0      
 15 19  1  0      
 19 20  1  0      
 20 21  1  0      
 22 23  2  0      
 23 21  1  0      
 24 25  1  0      
 26 27  1  0      
 27 23  1  0      
 28 29  2  0      
 29 30  1  0      
 30 26  1  0      
 31 32  1  0      
 32 29  1  0      
 33 34  1  0      
 34 35  1  0      
 35 17  1  0      
 36 37  2  0      
 37 38  1  0      
 38 33  1  0      
 39 40  2  0      
 40 41  1  0      
 41 37  1  0      
 42 43  1  0      
 43 44  1  0      
 44 40  1  0      
 26 25  1  1      
 42 45  1  1      
 42 46  1  0      
 46 47  1  0      
 32 47  1  0      
 31 48  1  0      
 48 49  2  0      
 49 50  1  0      
 50 51  1  0      
 51 52  2  0      
 52 48  1  0      
 51 53  1  0      
 53 54  2  0      
 54 55  1  0      
 55 56  2  0      
 56 52  1  0      
 19 57  2  0      
 25 58  2  0      
 46 59  2  0      
 44 60  2  0      
 34 61  1  1      
 61 62  2  0      
 61 63  1  0      
 18 64  1  6      
  9 65  1  6      
  8 66  1  6      
 66 67  1  0      
 11 68  1  0      
 14 13  1  1      
 27 69  1  1      
 41 70  1  0      
 20 71  1  1      
M  END
