# Supplementary material for: Structural Characterization of New Microcystins Containing Tryptophan and Oxidized Tryptophan Residues
Source: MDPI journal article supplement (doi:10.3390/md11083025), 2013-08-21
Supplement: s6 [file s6]

marinedrugs-11-03025-s003.mol
  corina  04141404523D 1   1.00000     0.00000 
CORINA 3.49 0023  12.04.2013
 74 76  0  0  0  0  0  0  0  0999 V2000
   -0.2403   -0.4225    1.7338 C   0  0  0  0  0  0  0  0  0  0  0  0
   -0.2539   -1.7554    1.3674 C   0  0  0  0  0  0  0  0  0  0  0  0
    0.9225   -2.4811    1.3559 C   0  0  0  0  0  0  0  0  0  0  0  0
    2.1127   -1.8739    1.7103 C   0  0  0  0  0  0  0  0  0  0  0  0
    2.1265   -0.5408    2.0759 C   0  0  0  0  0  0  0  0  0  0  0  0
    0.9498    0.1845    2.0888 C   0  0  0  0  0  0  0  0  0  0  0  0
    3.3951   -2.6653    1.6987 C   0  0  0  0  0  0  0  0  0  0  0  0
    4.0478   -2.5586    0.3190 C   0  0  0  0  0  0  0  0  0  0  0  0
    5.4088   -3.2571    0.3433 C   0  0  0  0  0  0  0  0  0  0  0  0
    6.0517   -3.1520   -1.0156 C   0  0  0  0  0  0  0  0  0  0  0  0
    6.4841   -4.2465   -1.6324 C   0  0  0  0  0  0  0  0  0  0  0  0
    6.9976   -4.1612   -3.0084 C   0  0  0  0  0  0  0  0  0  0  0  0
    7.4300   -5.2557   -3.6252 C   0  0  0  0  0  0  0  0  0  0  0  0
    7.9568   -5.1682   -5.0368 C   0  0  0  0  0  0  0  0  0  0  0  0
    7.9965   -3.7527   -5.4544 N   0  0  0  0  0  0  0  0  0  0  0  0
    8.4535   -7.8603   -5.5029 O   0  0  0  0  0  0  0  0  0  0  0  0
    9.3388   -7.2320   -4.9447 C   0  0  0  0  0  0  0  0  0  0  0  0
    9.3806   -5.7347   -5.0811 C   0  0  0  0  0  0  0  0  0  0  0  0
    7.2512   -3.3887   -6.5320 C   0  0  0  0  0  0  0  0  0  0  0  0
    7.2956   -1.9564   -7.0059 C   0  0  0  0  0  0  0  0  0  0  0  0
    7.9705   -1.9118   -8.3215 N   0  0  0  0  0  0  0  0  0  0  0  0
    9.6467   -0.7660   -7.3645 O   0  0  0  0  0  0  0  0  0  0  0  0
    9.1900   -1.2973   -8.3516 C   0  0  0  0  0  0  0  0  0  0  0  0
    9.1509    1.7140  -10.1717 O   0  0  0  0  0  0  0  0  0  0  0  0
   10.1486    0.9522  -10.6473 C   0  0  0  0  0  0  0  0  0  0  0  0
   10.8286   -0.0509   -9.7456 C   0  0  0  0  0  0  0  0  0  0  0  0
    9.9636   -1.3069   -9.6468 C   0  0  0  0  0  0  0  0  0  0  0  0
   13.0866    0.2522   -8.3805 O   0  0  0  0  0  0  0  0  0  0  0  0
   13.2211   -0.2292   -9.4871 C   0  0  0  0  0  0  0  0  0  0  0  0
   12.1495   -0.4005  -10.3127 N   0  0  0  0  0  0  0  0  0  0  0  0
   15.4099    0.5976  -10.3006 C   0  0  0  0  0  0  0  0  0  0  0  0
   14.5919   -0.6497   -9.9593 C   0  0  0  0  0  0  0  0  0  0  0  0
   12.6473   -7.9341   -3.6374 C   0  0  0  0  0  0  0  0  0  0  0  0
   11.3377   -7.1378   -3.5477 C   0  0  0  0  0  0  0  0  0  0  0  0
   10.2693   -7.9053   -4.2153 N   0  0  0  0  0  0  0  0  0  0  0  0
   15.3925   -8.2934   -3.7884 O   0  0  0  0  0  0  0  0  0  0  0  0
   14.9367   -7.3982   -4.4690 C   0  0  0  0  0  0  0  0  0  0  0  0
   13.4688   -7.4075   -4.8144 C   0  0  0  0  0  0  0  0  0  0  0  0
   14.8900   -6.5124   -7.0987 C   0  0  0  0  0  0  0  0  0  0  0  0
   15.7078   -5.9463   -6.2104 C   0  0  0  0  0  0  0  0  0  0  0  0
   15.7301   -6.3697   -4.8685 N   0  0  0  0  0  0  0  0  0  0  0  0
   17.0196   -2.8954   -8.0307 C   0  0  0  0  0  0  0  0  0  0  0  0
   16.0845   -3.9288   -7.5375 N   0  0  0  0  0  0  0  0  0  0  0  0
   16.5802   -4.8410   -6.6558 C   0  0  0  0  0  0  0  0  0  0  0  0
   16.3414   -2.1401   -9.1506 C   0  0  0  0  0  0  0  0  0  0  0  0
   15.2456   -1.3908   -8.8626 N   0  0  0  0  0  0  0  0  0  0  0  0
   14.8115    1.2767  -11.5054 C   0  0  0  0  0  0  0  0  0  0  0  0
   13.8157    0.8204  -12.0266 O   0  0  0  0  0  0  0  0  0  0  0  0
   13.6526    2.6979  -13.6805 N   0  0  0  0  0  0  0  0  0  0  0  0
   14.8368    3.1709  -13.1237 C   0  0  0  0  0  0  0  0  0  0  0  0
   15.4334    2.4902  -12.0482 C   0  0  0  0  0  0  0  0  0  0  0  0
   15.4386    4.3147  -13.6308 C   0  0  0  0  0  0  0  0  0  0  0  0
   16.6132    4.7823  -13.0771 C   0  0  0  0  0  0  0  0  0  0  0  0
   17.2022    4.1173  -12.0126 C   0  0  0  0  0  0  0  0  0  0  0  0
   16.6249    2.9780  -11.4982 C   0  0  0  0  0  0  0  0  0  0  0  0
    6.5530   -4.1969   -7.1076 O   0  0  0  0  0  0  0  0  0  0  0  0
   10.5026    1.0689  -11.7966 O   0  0  0  0  0  0  0  0  0  0  0  0
   16.7778   -2.2163  -10.2796 O   0  0  0  0  0  0  0  0  0  0  0  0
   17.7375   -4.7765   -6.2859 O   0  0  0  0  0  0  0  0  0  0  0  0
   10.9862   -6.9266   -2.0972 C   0  0  0  0  0  0  0  0  0  0  0  0
   10.1606   -7.6316   -1.5668 O   0  0  0  0  0  0  0  0  0  0  0  0
   11.5905   -5.9555   -1.3948 O   0  0  0  0  0  0  0  0  0  0  0  0
    3.2089   -3.1838   -0.6544 O   0  0  0  0  0  0  0  0  0  0  0  0
    3.3078   -2.6119   -1.9602 C   0  0  0  0  0  0  0  0  0  0  0  0
    6.4485   -5.5753   -0.9225 C   0  0  0  0  0  0  0  0  0  0  0  0
   16.5789   -5.6979   -3.8667 C   0  0  0  0  0  0  0  0  0  0  0  0
    6.3070   -2.5877    1.3855 C   0  0  0  0  0  0  0  0  0  0  0  0
   10.0241   -5.3687   -6.4229 C   0  0  0  0  0  0  0  0  0  0  0  0
    5.8681   -1.4201   -7.1464 C   0  0  0  0  0  0  0  0  0  0  0  0
   17.3798   -1.9217   -6.9093 C   0  0  0  0  0  0  0  0  0  0  0  0
   10.8406   -2.5588   -9.7015 C   0  0  0  0  0  0  0  0  0  0  0  0
   12.6893    3.5644  -14.0519 C   0  0  0  0  0  0  0  0  0  0  0  0
   11.7491    3.1952  -14.4340 H   0  0  0  0  0  0  0  0  0  0  0  0
   12.8784    4.7585  -13.9569 O   0  0  0  0  0  0  0  0  0  0  0  0
  1  2  2  0      
  2  3  1  0      
  3  4  2  0      
  4  5  1  0      
  5  6  2  0      
  6  1  1  0      
  4  7  1  0      
  7  8  1  0      
  8  9  1  0      
  9 10  1  0      
 10 11  2  0      
 11 12  1  0      
 12 13  2  0      
 14 15  1  0      
 16 17  2  0      
 17 18  1  0      
 18 14  1  0      
 15 19  1  0      
 19 20  1  0      
 20 21  1  0      
 22 23  2  0      
 23 21  1  0      
 24 25  1  0      
 26 27  1  0      
 27 23  1  0      
 28 29  2  0      
 29 30  1  0      
 30 26  1  0      
 31 32  1  0      
 32 29  1  0      
 33 34  1  0      
 34 35  1  0      
 35 17  1  0      
 36 37  2  0      
 37 38  1  0      
 38 33  1  0      
 39 40  2  0      
 40 41  1  0      
 41 37  1  0      
 42 43  1  0      
 43 44  1  0      
 44 40  1  0      
 42 45  1  0      
 45 46  1  0      
 32 46  1  0      
 31 47  1  0      
 47 48  2  0      
 49 50  1  0      
 50 51  2  0      
 51 47  1  0      
 50 52  1  0      
 52 53  2  0      
 53 54  1  0      
 54 55  2  0      
 55 51  1  0      
 19 56  2  0      
 25 57  2  0      
 45 58  2  0      
 44 59  2  0      
 60 61  2  0      
 60 62  1  0      
 63 64  1  0      
 11 65  1  0      
 41 66  1  0      
  8 63  1  0      
  9 67  1  0      
 14 13  1  0      
 18 68  1  0      
 34 60  1  0      
 20 69  1  0      
 42 70  1  0      
 27 71  1  0      
 26 25  1  0      
 49 72  1  0      
 72 73  1  0      
 72 74  2  0      
M  END
$$$$
