# Supplementary material for: Structural Characterization of New Microcystins Containing Tryptophan and Oxidized Tryptophan Residues
Source: MDPI journal article supplement (doi:10.3390/md11083025), 2013-08-21
Supplement: s7 [file s7]

marinedrugs-11-03025-s003.mol
  ChemDraw12271312032D

 74 76  0  0  0  0  0  0  0  0999 V2000
   -8.5458    1.4226    0.0000 C   0  0  0  0  0  0  0  0  0  0  0  0
   -8.5458    0.5976    0.0000 C   0  0  0  0  0  0  0  0  0  0  0  0
   -7.8314    0.1851    0.0000 C   0  0  0  0  0  0  0  0  0  0  0  0
   -7.1169    0.5976    0.0000 C   0  0  0  0  0  0  0  0  0  0  0  0
   -7.1169    1.4226    0.0000 C   0  0  0  0  0  0  0  0  0  0  0  0
   -7.8314    1.8351    0.0000 C   0  0  0  0  0  0  0  0  0  0  0  0
   -6.4024    0.1851    0.0000 C   0  0  0  0  0  0  0  0  0  0  0  0
   -5.6879    0.5976    0.0000 C   0  0  0  0  0  0  0  0  0  0  0  0
   -4.9735    0.1851    0.0000 C   0  0  0  0  0  0  0  0  0  0  0  0
   -4.2590    0.5976    0.0000 C   0  0  0  0  0  0  0  0  0  0  0  0
   -3.5445    0.1851    0.0000 C   0  0  0  0  0  0  0  0  0  0  0  0
   -2.8301    0.5976    0.0000 C   0  0  0  0  0  0  0  0  0  0  0  0
   -2.1156    0.1851    0.0000 C   0  0  0  0  0  0  0  0  0  0  0  0
   -1.4011    0.5976    0.0000 C   0  0  0  0  0  0  0  0  0  0  0  0
   -0.6866    0.1851    0.0000 N   0  0  0  0  0  0  0  0  0  0  0  0
    0.0278    1.4226    0.0000 O   0  0  0  0  0  0  0  0  0  0  0  0
   -0.6866    1.8351    0.0000 C   0  0  0  0  0  0  0  0  0  0  0  0
   -1.4011    1.4226    0.0000 C   0  0  0  0  0  0  0  0  0  0  0  0
   -0.6866   -0.6399    0.0000 C   0  0  0  0  0  0  0  0  0  0  0  0
    0.0278   -1.0524    0.0000 C   0  0  0  0  0  0  0  0  0  0  0  0
    0.7423   -0.6399    0.0000 N   0  0  0  0  0  0  0  0  0  0  0  0
    1.4568   -1.8774    0.0000 O   0  0  0  0  0  0  0  0  0  0  0  0
    1.4568   -1.0524    0.0000 C   0  0  0  0  0  0  0  0  0  0  0  0
    2.1712   -2.2899    0.0000 O   0  0  0  0  0  0  0  0  0  0  0  0
    2.8857   -1.8774    0.0000 C   0  0  0  0  0  0  0  0  0  0  0  0
    2.8857   -1.0524    0.0000 C   0  0  0  0  0  0  0  0  0  0  0  0
    2.1712   -0.6399    0.0000 C   0  0  0  0  0  0  0  0  0  0  0  0
    4.3147   -1.8774    0.0000 O   0  0  0  0  0  0  0  0  0  0  0  0
    4.3147   -1.0524    0.0000 C   0  0  0  0  0  0  0  0  0  0  0  0
    3.6002   -0.6399    0.0000 N   0  0  0  0  0  0  0  0  0  0  0  0
    5.7436   -1.0524    0.0000 C   0  0  0  0  0  0  0  0  0  0  0  0
    5.0291   -0.6399    0.0000 C   0  0  0  0  0  0  0  0  0  0  0  0
    0.7423    2.6601    0.0000 C   0  0  0  0  0  0  0  0  0  0  0  0
    0.0278    3.0726    0.0000 C   0  0  0  0  0  0  0  0  0  0  0  0
   -0.6866    2.6601    0.0000 N   0  0  0  0  0  0  0  0  0  0  0  0
    2.1712    1.8351    0.0000 O   0  0  0  0  0  0  0  0  0  0  0  0
    2.1712    2.6601    0.0000 C   0  0  0  0  0  0  0  0  0  0  0  0
    1.4568    3.0726    0.0000 C   0  0  0  0  0  0  0  0  0  0  0  0
    3.6002    1.8351    0.0000 C   0  0  0  0  0  0  0  0  0  0  0  0
    3.6002    2.6601    0.0000 C   0  0  0  0  0  0  0  0  0  0  0  0
    2.8857    3.0726    0.0000 N   0  0  0  0  0  0  0  0  0  0  0  0
    5.0291    1.8351    0.0000 C   0  0  0  0  0  0  0  0  0  0  0  0
    5.0291    2.6601    0.0000 N   0  0  0  0  0  0  0  0  0  0  0  0
    4.3147    3.0726    0.0000 C   0  0  0  0  0  0  0  0  0  0  0  0
    5.4860    1.1005    0.0000 C   0  0  0  0  0  0  0  0  0  0  0  0
    5.0291    0.4061    0.0000 N   0  0  0  0  0  0  0  0  0  0  0  0
    6.1561   -1.7669    0.0000 C   0  0  0  0  0  0  0  0  0  0  0  0
    5.8205   -2.5206    0.0000 O   0  0  0  0  0  0  0  0  0  0  0  0
    6.4336   -3.0726    0.0000 N   0  0  0  0  0  0  0  0  0  0  0  0
    7.1481   -2.6601    0.0000 C   0  0  0  0  0  0  0  0  0  0  0  0
    6.9766   -1.8531    0.0000 C   0  0  0  0  0  0  0  0  0  0  0  0
    7.9327   -2.9150    0.0000 C   0  0  0  0  0  0  0  0  0  0  0  0
    8.5458   -2.3630    0.0000 C   0  0  0  0  0  0  0  0  0  0  0  0
    8.3743   -1.5560    0.0000 C   0  0  0  0  0  0  0  0  0  0  0  0
    7.5897   -1.3011    0.0000 C   0  0  0  0  0  0  0  0  0  0  0  0
   -1.4011   -1.0524    0.0000 O   0  0  0  0  0  0  0  0  0  0  0  0
    3.6002   -2.2899    0.0000 O   0  0  0  0  0  0  0  0  0  0  0  0
    6.3110    1.1005    0.0000 O   0  0  0  0  0  0  0  0  0  0  0  0
    4.3147    3.8976    0.0000 O   0  0  0  0  0  0  0  0  0  0  0  0
    0.0278    3.8976    0.0000 C   0  0  0  0  0  0  0  0  0  0  0  0
    0.7423    4.3101    0.0000 O   0  0  0  0  0  0  0  0  0  0  0  0
   -0.6866    4.3101    0.0000 O   0  0  0  0  0  0  0  0  0  0  0  0
   -5.6879    1.4226    0.0000 O   0  0  0  0  0  0  0  0  0  0  0  0
   -5.1046    2.0060    0.0000 C   0  0  0  0  0  0  0  0  0  0  0  0
   -3.5445   -0.6399    0.0000 C   0  0  0  0  0  0  0  0  0  0  0  0
    2.8857    3.8976    0.0000 C   0  0  0  0  0  0  0  0  0  0  0  0
   -4.9735   -0.6399    0.0000 C   0  0  0  0  0  0  0  0  0  0  0  0
   -2.1156    1.8351    0.0000 C   0  0  0  0  0  0  0  0  0  0  0  0
    0.0278   -1.8774    0.0000 C   0  0  0  0  0  0  0  0  0  0  0  0
    4.3147    1.4226    0.0000 C   0  0  0  0  0  0  0  0  0  0  0  0
    2.1712    0.1851    0.0000 C   0  0  0  0  0  0  0  0  0  0  0  0
    6.4336   -3.8976    0.0000 C   0  0  0  0  0  0  0  0  0  0  0  0
    5.7192   -4.3101    0.0000 H   0  0  0  0  0  0  0  0  0  0  0  0
    7.1481   -4.3101    0.0000 O   0  0  0  0  0  0  0  0  0  0  0  0
  1  2  2  0      
  2  3  1  0      
  3  4  2  0      
  4  5  1  0      
  5  6  2  0      
  6  1  1  0      
  4  7  1  0      
  7  8  1  0      
  8  9  1  0      
  9 10  1  0      
 10 11  2  0      
 11 12  1  0      
 12 13  2  0      
 14 15  1  0      
 16 17  2  0      
 17 18  1  0      
 18 14  1  0      
 15 19  1  0      
 19 20  1  0      
 20 21  1  0      
 22 23  2  0      
 23 21  1  0      
 24 25  1  0      
 26 27  1  0      
 27 23  1  0      
 28 29  2  0      
 29 30  1  0      
 30 26  1  0      
 31 32  1  0      
 32 29  1  0      
 33 34  1  0      
 34 35  1  0      
 35 17  1  0      
 36 37  2  0      
 37 38  1  0      
 38 33  1  0      
 39 40  2  0      
 40 41  1  0      
 41 37  1  0      
 42 43  1  0      
 43 44  1  0      
 44 40  1  0      
 42 45  1  0      
 45 46  1  0      
 32 46  1  0      
 31 47  1  0      
 47 48  2  0      
 49 50  1  0      
 50 51  2  0      
 51 47  1  0      
 50 52  1  0      
 52 53  2  0      
 53 54  1  0      
 54 55  2  0      
 55 51  1  0      
 19 56  2  0      
 25 57  2  0      
 45 58  2  0      
 44 59  2  0      
 60 61  2  0      
 60 62  1  0      
 63 64  1  0      
 11 65  1  0      
 41 66  1  0      
  8 63  1  0      
  9 67  1  0      
 14 13  1  0      
 18 68  1  0      
 34 60  1  0      
 20 69  1  0      
 42 70  1  0      
 27 71  1  0      
 26 25  1  0      
 49 72  1  0      
 72 73  1  0      
 72 74  2  0      
M  END
